# Supplementary material
Source: Springer Nature journal article supplement (https://www.springermedizin.de/resource/supplementary/12876_2011_696_MOESM1_ESM.pdf/9437558)
Supplement: MOESM1 [file 9437558]

**A**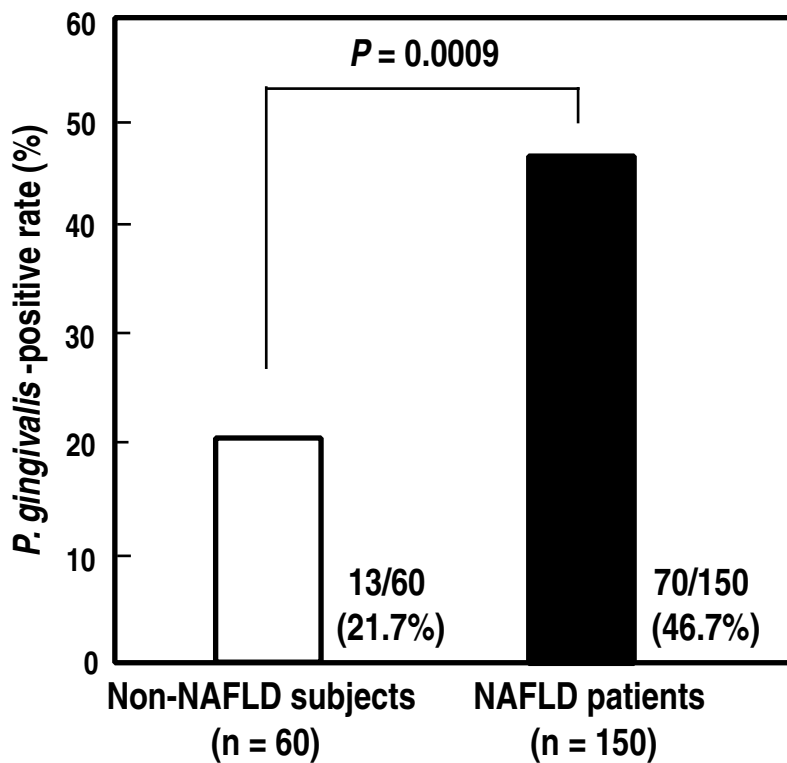

OR: 3.16  
CI<sub>95</sub>: 1.58-6.33

**B**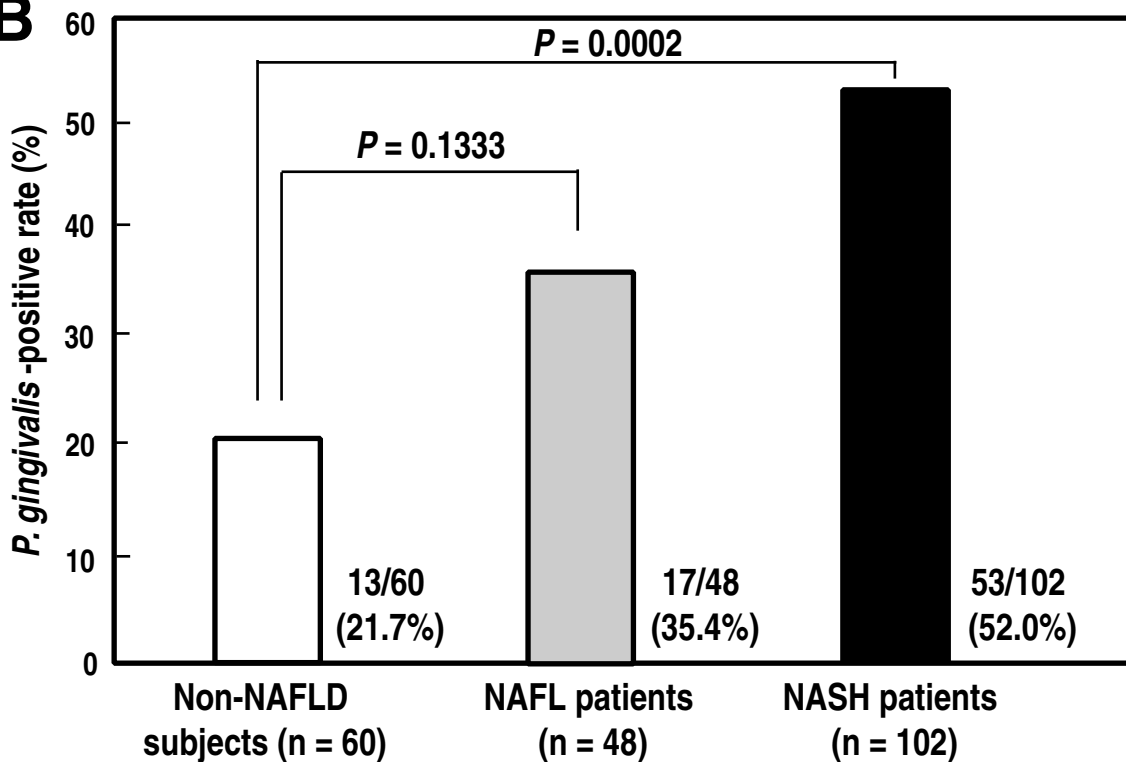

|                    |                                          |
|--------------------|------------------------------------------|
| NASH vs. Non-NAFLD | OR: 3.91, CI <sub>95</sub> : 1.89 - 8.09 |
| NASH vs. NAFL      | OR: 1.99, CI <sub>95</sub> : 0.97 - 4.00 |
| NAFL vs. Non-NAFLD | OR: 1.98, CI <sub>95</sub> : 0.84 - 4.65 |
